# Supplementary material
Source: publisher figshare collection journal article supplement (https://sage.figshare.com/ndownloader/files/17961572)
Supplement: Supplementary file 1 [file 17961572]

**Web Appendix A. Calculator – used in Experiments 1 and 2 (condition below contains the “paid \$1,000” disclaimer)**

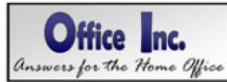

Welcome!  
Please [log in](#)

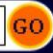

Prefer to order over the phone? 1.800.I.OFFICE

..Search results for: "basic calculator" 1 item(s) found

Office Supplies

Show 15 results per page | [1] of 1 pages

**Narrow by Brand:** .....  
Tech Smart (1)

**Narrow by Price:**  
\$0 - \$15 (1)

**Expand Search:**  
Remove 'office supplies'  
Remove 'technology'  
Remove 'scientific calculators'

**Featured Suppliers:**.....  
Vasquez Inc. .... Ink and Things..... The Oak Leaf ..... The Staple Hut..... Furniture Emporium..... The Notebook .....

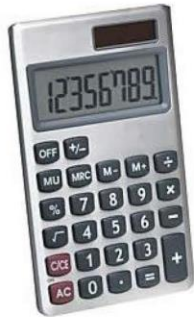

Tech Smart SI89645 Basic Calculator (ITEM #678765)

- Large, easy to read 8 digit display
- Solar powered, no batteries necessary
- Large keys

\$12.95 (each).....Qty. 1

[Add to Cart](#)

| Description                                                                                     | Product Reviews                                                                                                                                                                                                                                                                                                                                                                                                                                              |
|-------------------------------------------------------------------------------------------------|--------------------------------------------------------------------------------------------------------------------------------------------------------------------------------------------------------------------------------------------------------------------------------------------------------------------------------------------------------------------------------------------------------------------------------------------------------------|
| <p>September 8, 2008<br/>jonny765<br/>Fort Worth TX<br/><a href="#">Read all my reviews</a></p> | <p><b>Great Retail Calculator</b><br/>I have been using this calculator for about 4 years. The large 3/4 " display is easily seen at arms length. Using the memory function to set the sales tax rate and use one button to apply it makes that chore really fast. Solar powered is great: 4 years and no battery change!!</p> <p>This reviewer was paid \$1,000 by the manufacturer to write this review.</p> <p>Was this review helpful to you? yes no</p> |

**Site Information**

- Site Map
- Handicap Accessibility
- Office Inc. en Espanol
- Terms of Use
- Privacy Policy

**Customer Service**

- Contact Us
- My Account
- Order Tracking
- Shipping Information
- Delivery Information
- Refunds and Exchanges
- Website Feedback

**Corporate Information**

- About us
- Mission Statement
- Corporate Vision
- Employment Opportunities
- Investor Information
- Public Affairs

**Ways to Save You Money**

- Office Inc. Credit Card
- Rebate Center
- Office Rewards
- E-mail Coupon Sign-up
- Teacher/Govt Discounts

Copyright © 2009 by Office Inc. All rights reserved. Prices shown are in U.S. Dollars. At this time we do not offer international pricing via the website, you may contact us directly at 1.800.I.OFFICE to discuss international rates. Prices are subject to change without notice, and all orders are subject to the Terms of Use.

Participants were instructed to, “Imagine you have just enrolled in a college course for which you **need to purchase a simple calculator**. You have decided to shop online and have found yourself looking at the office supply retailer’s (Office Inc.) webpage pictured on the following page. Please examine the details of the webpage and answer the questions that follow.”

**Web Appendix B. Restaurant – used in Experiments 1, 2 and 3 (condition below contains the disclaimer of no relationship/no compensation)**



*Find the best place in town!*

..Please [Log In](#) or [Register](#).

Search all Restaurants:  SEARCH

Home

Reviews

Best in Town

News

...Restaurants > New York, NY > Special Occasions > Firenze

---



**.... Firenze**  
 352 S. 1st St., New York, NY 58923  
 Phone: (555)555-5555  
 Website: [www.firenzenewyork.com](http://www.firenzenewyork.com)  
 Reservations available online through [Firenze's website](#)

Cuisine: Italian; seafood, steak, and pasta.

**Firenze Stats**

**Opened in:**  
November, 1978

**Owner and Premier Chef:**  
Owned by Jon Lezenge.  
Chef is Tina Mitzurugi.

**Recommended for:**  
Special Occasions, Fine Dining, Business Dining, and Romance

**Dress Code:**  
Business casual minimum, semi-formal preferred.

**Hours:**  
Mon - Thur: 4:00PM to 10:00PM  
Fri - Sat: 4:00PM to 11:30PM  
Closed on Sundays

**Method of Payment:**  
Cash, check, and all major credit cards are accepted for payment

**Customer Reviews**

..1 Member Review for "Firenze":

Display  Most Helpful

March 12 , 2008  
newyorker576  
New York, NY

[Read all my reviews](#)

**No finer place in New York City!**  
 By far the best restaurant in all of New York! Firenze combines a modern, elegant decor with cuisine defined by flawless presentation and mouthwatering taste. Whether you are trying to impress your firm's new client or the love of your life, there is no better choice than Firenze.  
 This reviewer was not compensated for this review and has no relationship with the restaurant.

Was this review helpful to you? [yes](#) [no](#)

**Additional Info**



[Need Directions to Firenze?](#)

**Site Information**

- [Site Map](#)
- [Handicap Accessibility](#)
- [Privacy Policy](#)

**Restaurants by Major City**

- [New York](#)
- [Chicago](#)
- [Atlanta](#)
- [Seattle](#)
- [Houston](#)
- [Los Angeles](#)
- [Washington D.C.](#)

**Corporate Information**

- [About us](#)
- [Mission Statement](#)
- [Corporate Vision](#)
- [Employment Opportunities](#)
- [Investor Information](#)
- [Public Affairs](#)

**Customer Service**

- [Contact Us](#)
- [My Account](#)
- [Website Feedback](#)
- [E-mail Coupon Sign-up](#)
- [Teacher/Govt Discounts](#)

Copyright © 2009 by DiningOut.com. All rights reserved.

Participants were asked to, “Imagine you have just moved to New York City and are **looking for a restaurant at which to entertain some important guests**. You have decided to do some research through an online restaurant guide (DiningOut.com) and have found yourself looking at the webpage pictured on the following page. Please examine the details of the webpage and answer the questions that follow.”

**Web Appendix C. Brewer – used in Experiment 3 (condition below contains the “employee” disclaimer)**

The screenshot shows the e-Appliances Inc. website interface. At the top, there is a search bar and navigation links for 'HOME', 'DEPARTMENTS', and 'WEEKLY AD'. The breadcrumb trail indicates the path: Departments > Appliances > Kitchen > Coffee Makers > Espresso. The main product is the 'H3400 - Single Serve Home Brewer by PerfectBrew' (Item #BR0762), priced at \$109.99. A customer review from 'laura765' dated September 8, 2010, is displayed, along with a disclaimer: 'This reviewer is an employee of the manufacturer of this product.' Below the product, there are recommendations for other coffee makers and a promotional banner for free shipping and delivery.

Participants were asked to, “Imagine you have just decided to purchase a single-serve brewer for making hot beverages. You have decided to shop online and have found yourself looking at the online retailer’s (Kitchen Inc.) webpage pictured on the following page. Please examine the details of the webpage and answer the questions that follow.”
